# Supplementary material
Source: publisher figshare collection journal article supplement (https://karger.figshare.com/ndownloader/files/13023758)
Supplement: Supplementary file 1 [file 13023758]

*Brain Region Section Analysis Sample Sizes*

**Supplementary Table 2**. Number of samples used in models for each brain region section analysis (see Table III in paper).

| **Collection Locality** | **A. Hippo. Rel. (female, male)** | **B. Hippo. Abs. (female, male)** | **A. TrSM Rel. (female, male)** | **B. TrSM Abs (female, male)** | **A & B. Telen (female, male)** |
| --- | --- | --- | --- | --- | --- |
| **Bega** | -, - | 1, - | -, - | 1, - | -, - |
| **Nowra** | -, 3 | -, 3 | -, 1 | -, 1 | -, 3 |
| **Maitland** | 3, - | 3, - | 3, - | 3, 1 | 3, - |
| **Austral Eden** | 1, - | 1, - | 1, - | 2, 1 | 1, - |
| **Lismore** | 2, 2 | 2, 2 | 2, 1 | 2, 1 | 2, 2 |
| **Nyngan** | -, 2 | -, 2 | -, 2 | -, 6 | -, 2 |
| **Moree** | 1, 2 | 1, 2 | 1, 2 | 1, 5 | 1, 2 |
| **Lemon Tree** | -, 1 | -, 1 | -, 1 | -, 1 | -, 1 |
| **Total** | 7, 10 | 8, 10 | 7, 7 | 9, 16 | 7, 10 |
